# Supplementary material for: Design and fabrication of bimetallic plasmonic colloids through cold nanowelding
Source: Royal Society of Chemistry journal article supplement (doi:10.1039/d2nr02092k), 2022-01-01
Supplement: d2nr02092k1.pdf [file d2nr02092k1.pdf]

## Electronic Supplementary Material

# Design and fabrication of bimetallic plasmonic colloids through cold nanowelding

Mariacristina Turino<sup>a</sup>, Enrique Carbó-Argibay<sup>b</sup>, Miguel Correa-Duarte<sup>\*c</sup>, Luca Guerrini<sup>\*a</sup>,  
Nicolas Pazos-Perez<sup>\*a</sup> and Ramon A. Alvarez-Puebla<sup>\*a,d</sup>

<sup>a</sup> Department of Physical and Inorganic Chemistry and EMaS, Universitat Rovira I Virgili, Carrer de Marcel·lí Domingo s/n, 43007 Tarragona, Spain.; nicolas.pazos@urv.cat (N.P.P.); luca.guerrini@urv.cat (L.G.), ramon.alvarez@urv.cat (R.A.A.P.).

<sup>b</sup> International Iberian Nanotechnology Laboratory (INL), Avenida Mestre José Veiga s/n, 4715-330, Braga, Portugal.

<sup>c</sup> Departamento de Química Física Universidade de VigoVigo 36310, Spain.

<sup>d</sup> ICREA, Passeig Lluís Companys 23, 08010 Barcelona, Spain.

\* Correspondence: nicolas.pazos@urv.cat (N.P.P); luca.guerrini@urv.cat (L.G.); ramon.alvarez@urv.cat (R.A.A.P.)

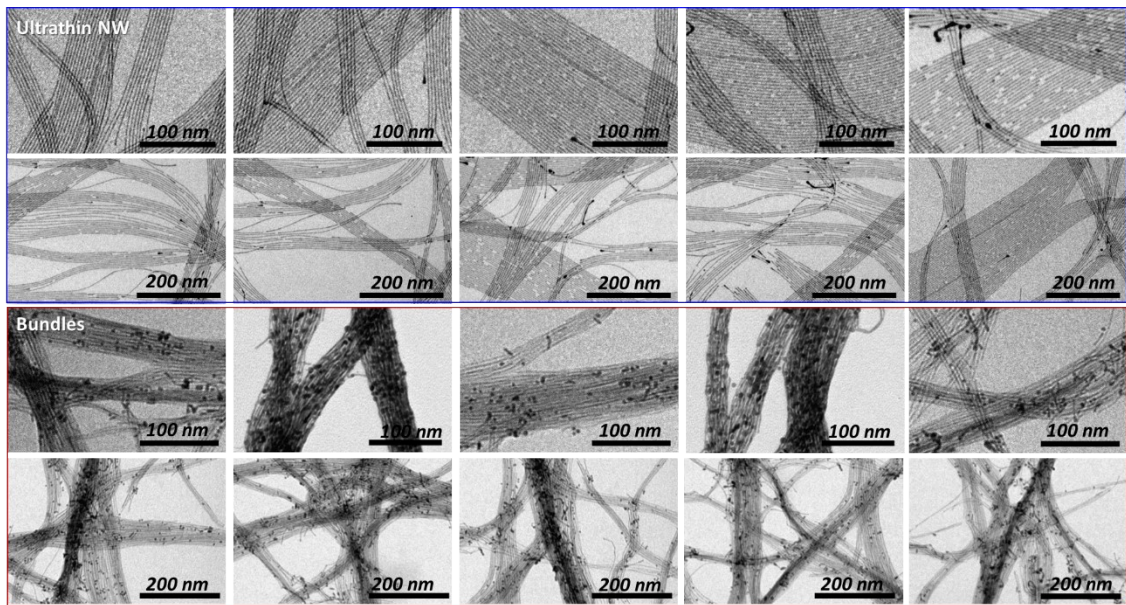

**Figure S1.** TEM images of the as-synthesized ultrathin Au nanowires (top). TEM images of the Au bundles formed after PEI coating (bottom).

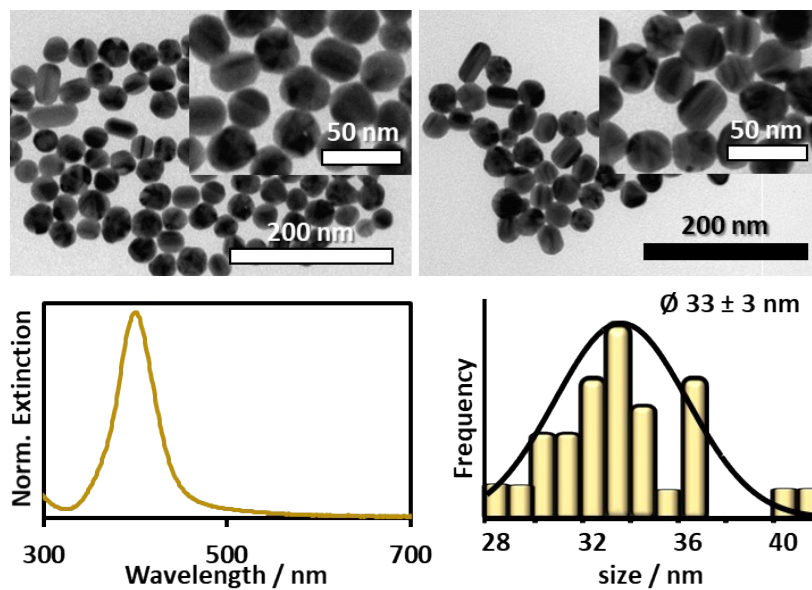

**Figure S2.** TEM images, extinction spectrum, and size histogram distribution of the negatively charged citrate-capped silver nanoparticles of  $33 \pm 3$  nm (AgNP<sub>33</sub>).

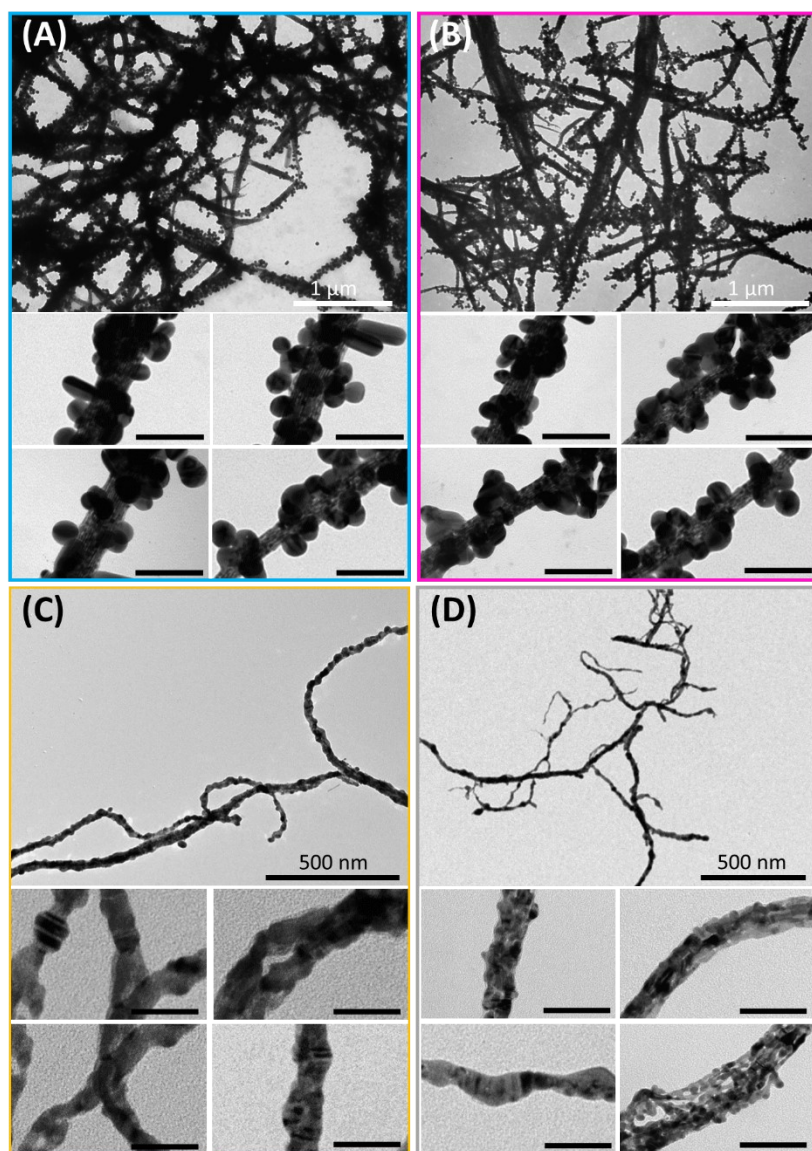

**Figure S3.** Additional TEM images of bundle@AgNP<sub>33</sub> at different stages of the welding process: (A) 1 day, (B) 4 days, (C) 14 days and (D) 30 days. When otherwise indicated, scale bar = 100 nm.

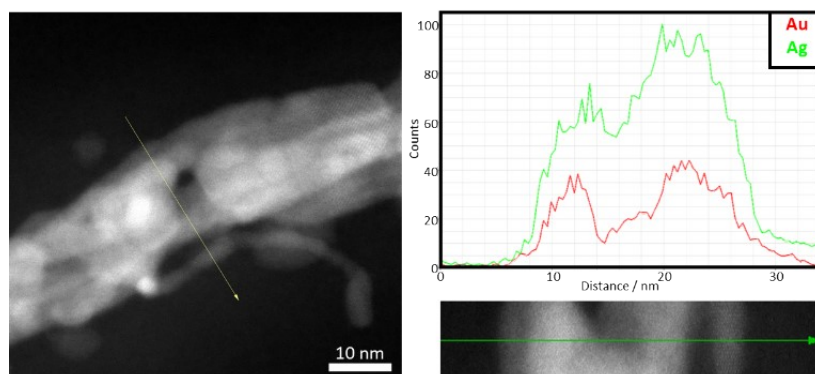

**Figure S4.** STEM image and EDX line scan analysis bundle@AgNP<sub>33</sub> after 14 days of welding showing how Ag and Au are homogeneously along the bundles in a core-shell configuration.

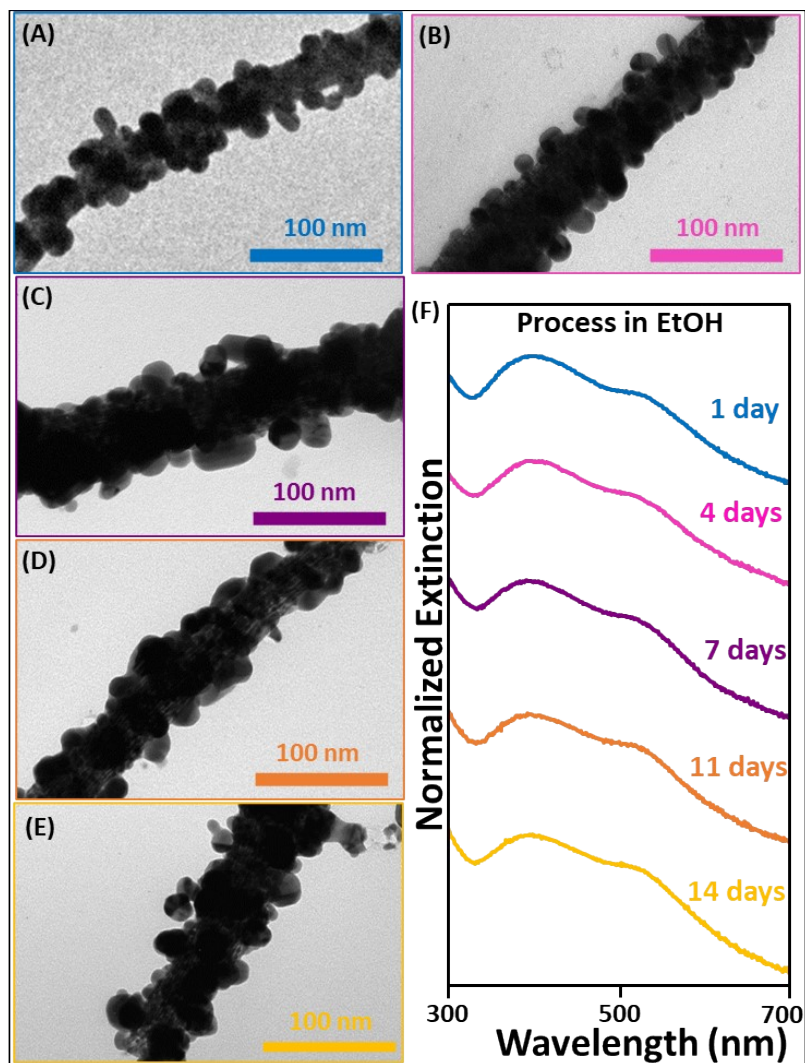

**Figure S5.** (A-E) Representative TEM images of the bundle@AgNP<sub>33</sub> assemblies at different stages of the welding process in ethanol (1, 4, 7, 11 and 14 days, from A to E, respectively). (F) Extinction spectra of the bundle@AgNP<sub>33</sub> assemblies over time. The intensity of the stacked extinction spectra was adjusted for better visualization.

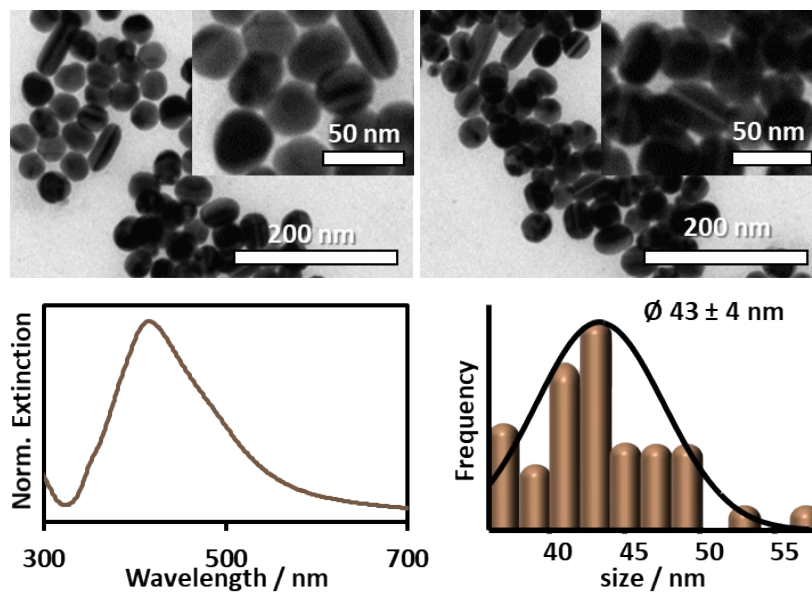

**Figure S6.** TEM images, extinction spectrum, and size histogram distribution of the negatively charged citrate-capped silver nanoparticles of  $43 \pm 4 \text{ nm}$  ( $\text{AgNP}_{43}$ ).

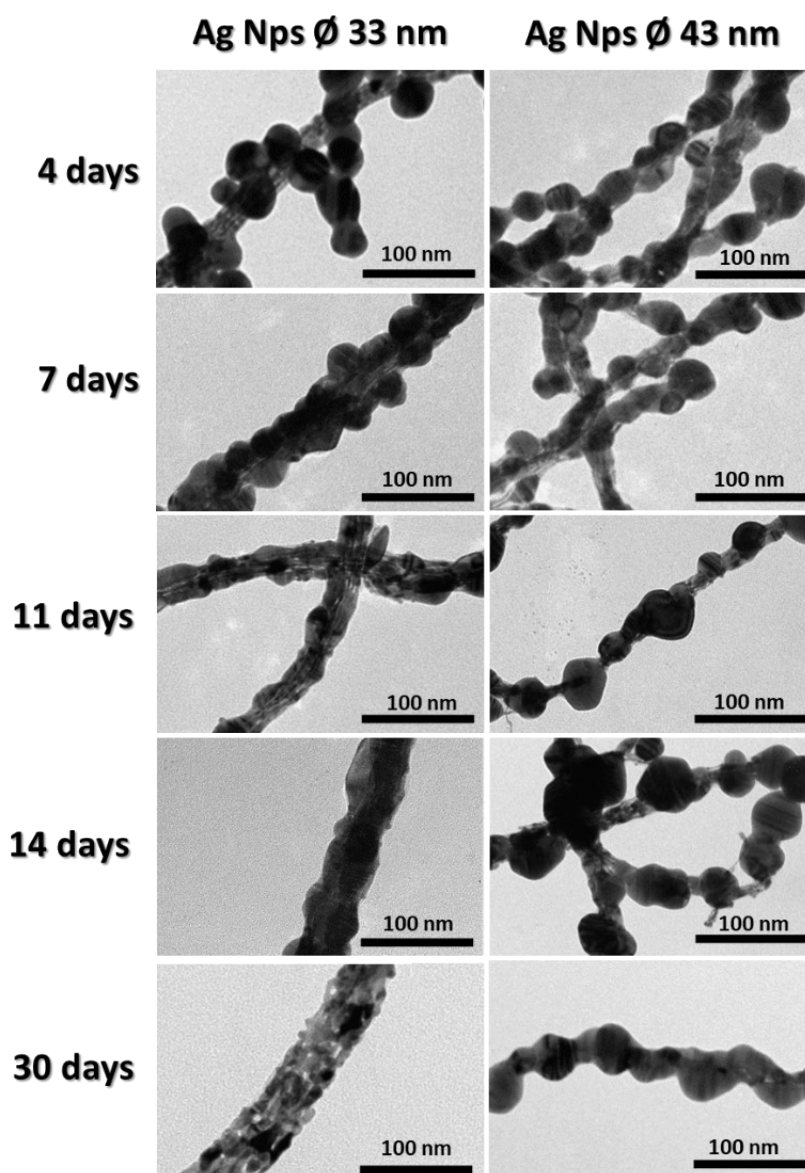

**Figure S7.** TEM images showing the comparison over time (4, 7, 11, 14 and 30 days) of bundle@AgNP assemblies using two different sizes (33 and 43 nm, left and right respectively) of AgNPs.



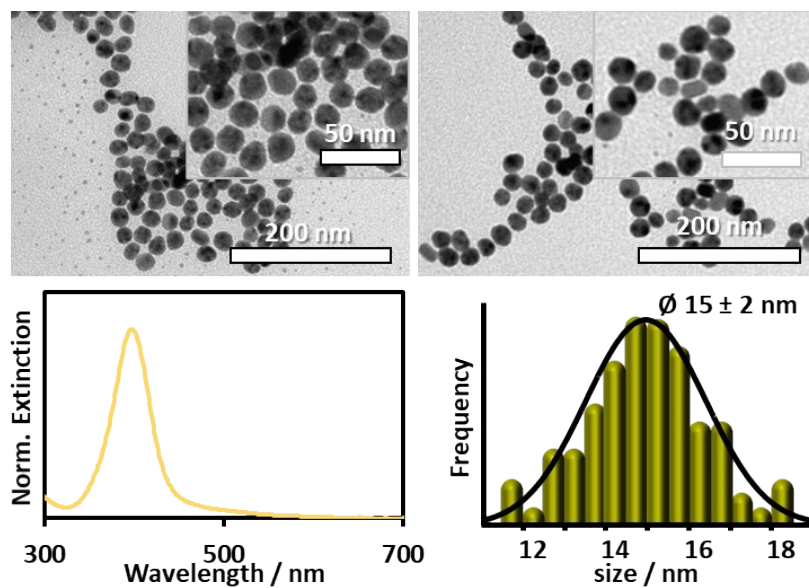

**Figure S8.** TEM images, extinction spectrum, and size histogram distribution of the negatively charged citrate-capped silver nanoparticles of  $15 \pm 2$  nm ( $\text{AgNP}_{15}$ ).

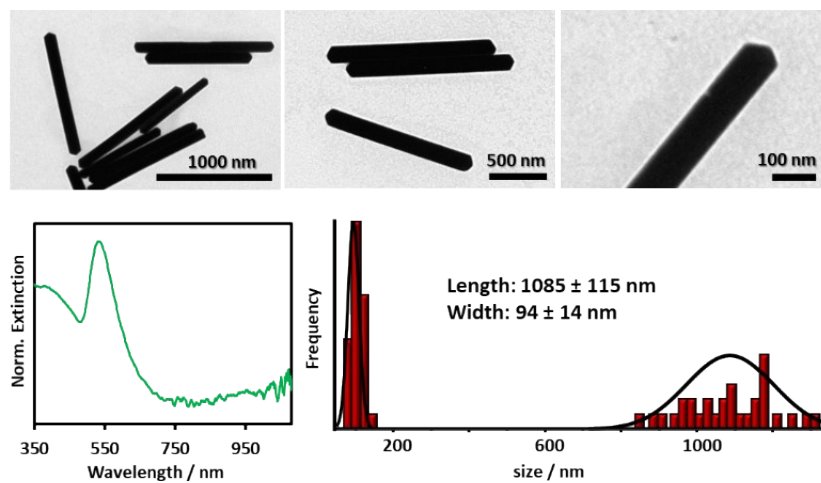

**Figure S9.** TEM images, extinction spectrum, and size histogram distribution of the as-synthesized AuNRs of  $1085 \pm 115$  nm long and  $94 \pm 14$  nm thick (AuNRs).

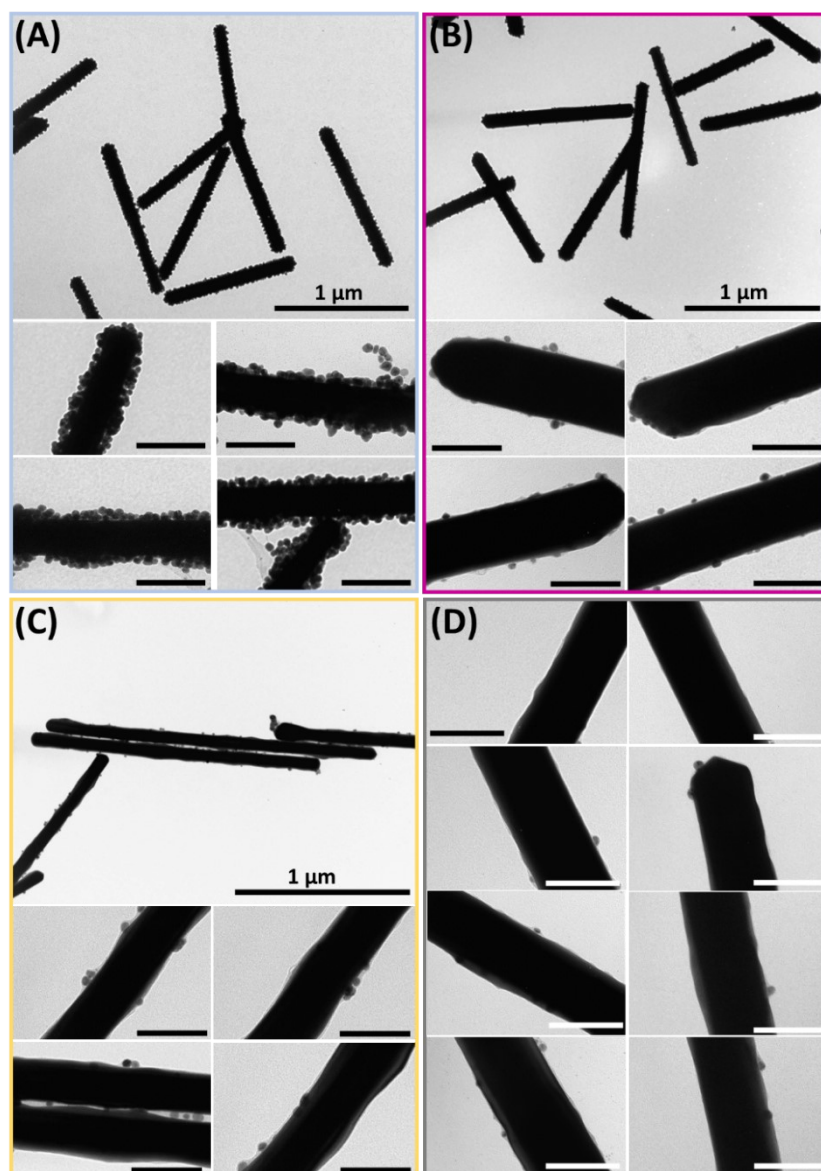

**Figure S10.** Additional TEM images of NR@AgNP<sub>15</sub> assemblies at different stages of the welding process: (A) 30 min, (B) 6 h, (C) 2 days, and (D) 4 days. When otherwise indicated, scale bar = 100 nm.

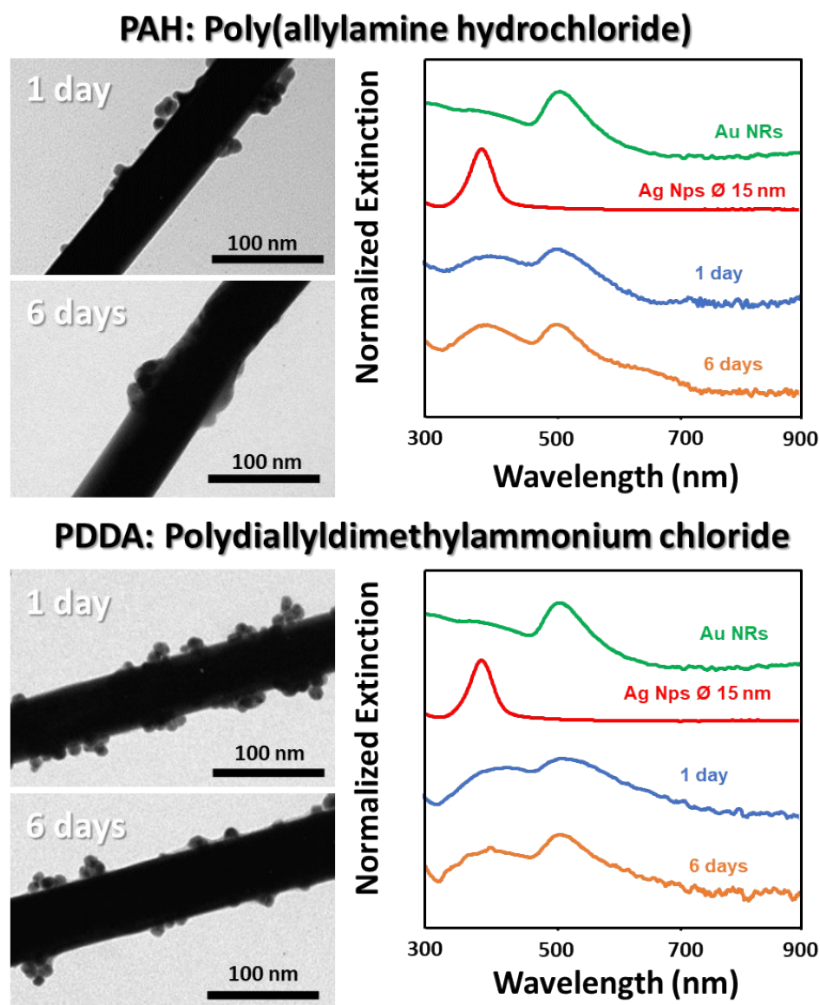

**Figure S11.** TEM images and extinction spectra of NR@AgNP<sub>15</sub> assemblies produced with two different polyelectrolytes (PAH (top) and PDDA (bottom)) at two different stages of the welding process (1 and 6 days). The extinction spectra of the individual NPs components are also included for comparison.

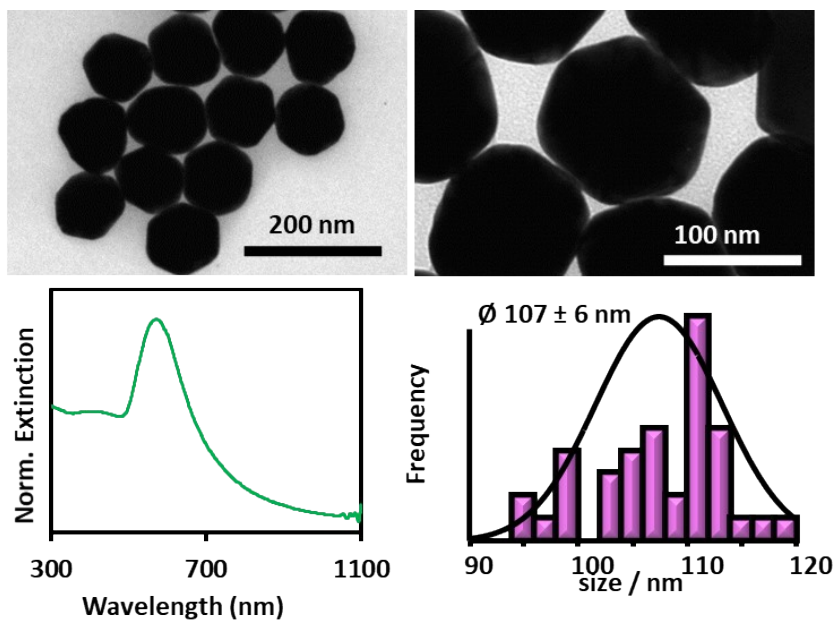

**Figure S12.** TEM images, extinction spectrum, and size histogram distribution of  $107 \pm 6$  nm Au nanoparticles (AuNP<sub>107</sub>).

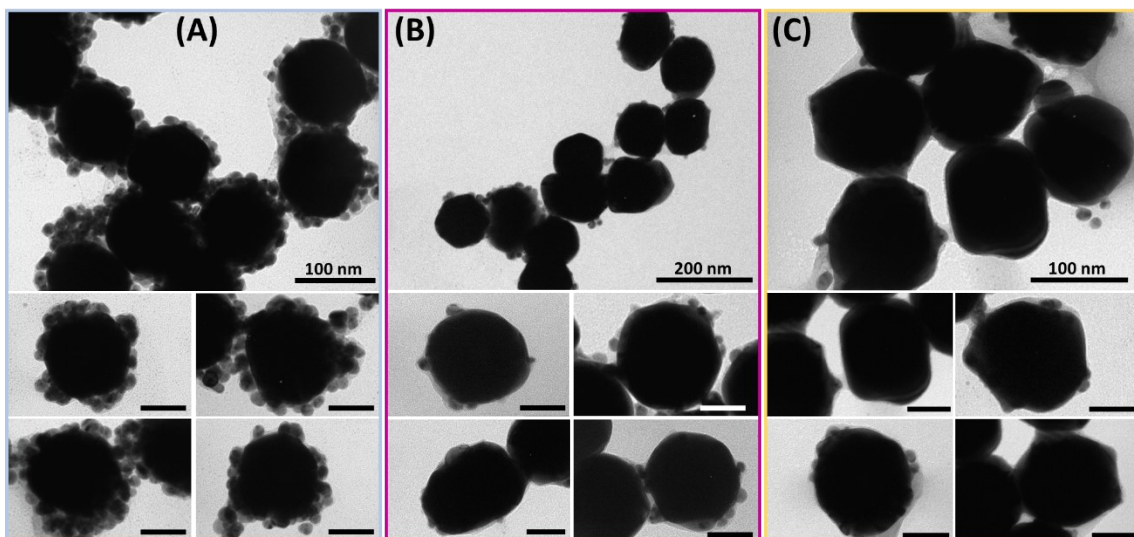

**Figure S13.** Additional TEM images of AuNP<sub>107</sub>@AgNP<sub>15</sub> at different stages of the welding process: (A) 1 day, (B) 8 days, and (C) 20 days. When otherwise indicated, scale bar = 50 nm.

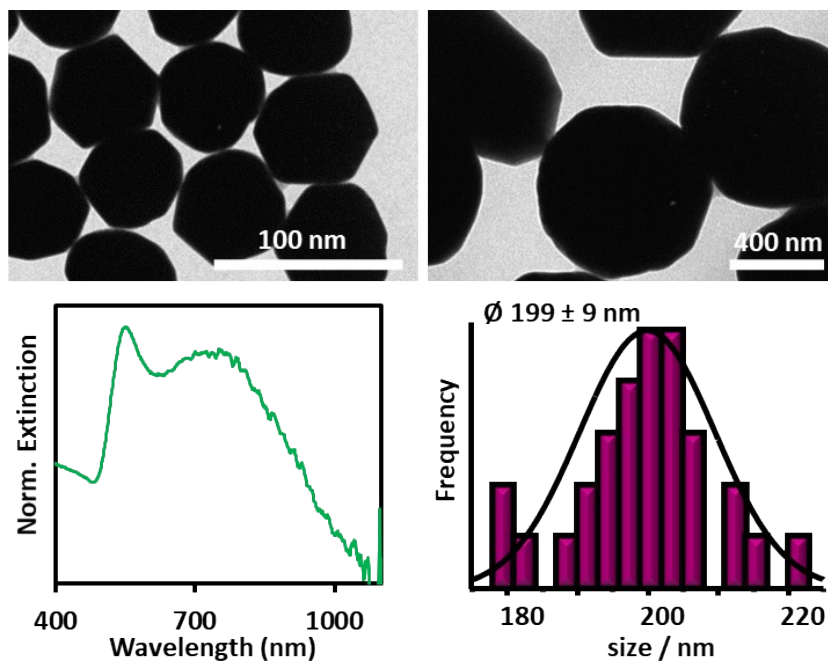

**Figure S14.** TEM images, extinction spectrum, and size histogram distribution of  $199 \pm 9 \text{ nm}$  Au nanoparticles (AuNP<sub>199</sub>).

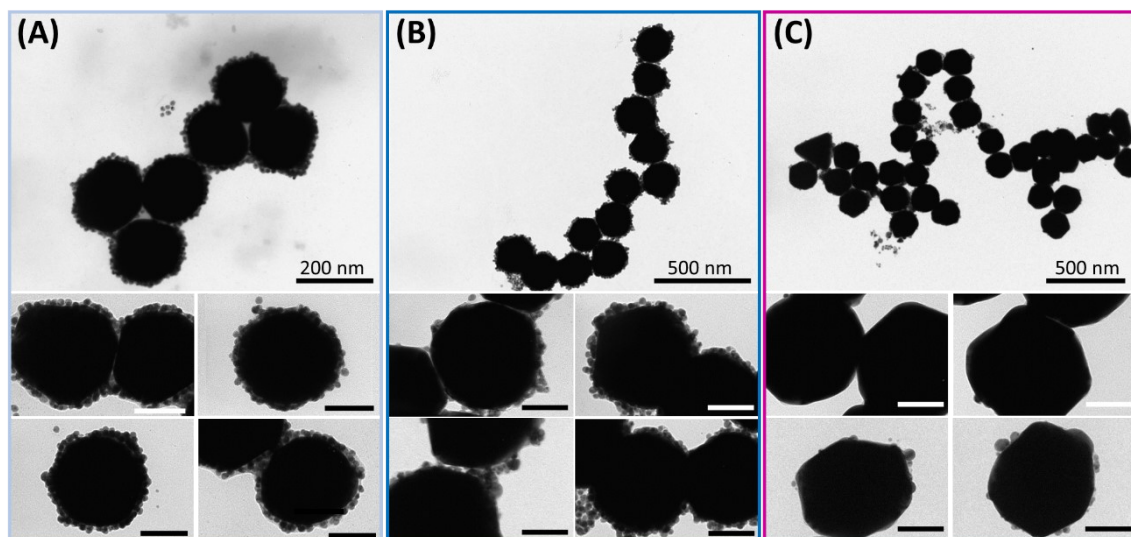

**Figure S15.** Additional TEM images of AuNP<sub>199</sub>@AgNP<sub>15</sub> at different stages of the welding process: (A) 1 day, (B) 3 days, and (C) 6 days. When otherwise indicated, scale bar = 100 nm.
